# Supplementary material
Source: MDPI journal article supplement (https://www.mdpi.com/2311-7524/9/4/517)
Supplement: s1 [file s1]

**Table S1. Primers for all manuscript.**

| Experiment | Annotation                              | Forward sequence                        | Reverse sequence                     |
|------------|-----------------------------------------|-----------------------------------------|--------------------------------------|
| P1         | Reverse Transcription-qPCR<br>(RT-qPCR) | CGGTGAAGTTGGGATGTG                      | TTTTGTTTCTCCGTAAGGC                  |
| P2         | Full length of sequence                 | GGATAACAACATAGAAAC<br>AGT               | TAAACATCAGAAACGAAAAA<br>GA           |
| P3         | <i>In situ</i> hybridization            | AAACTGCAGAAGTCGGAGG<br>ACAGAACAA        | GGGGGTACCCAGCGGTCACA<br>AGAACAG      |
| P4         | Subcellular localization                | CAGTGGTCTCACAACATGA<br>AAATCTTTAACCCATC | CGATGGTCTCAAATGATGGTT<br>TTAATTTTGTG |
